# Supplementary material for: Immunomodulatory activity ofSenegalia macrostachya(Reichenb. ex DC.) Kyal. & Boatwr seed polysaccharide fraction through the activation of the MAPK signaling pathway in RAW264.7 macrophages
Source: Royal Society of Chemistry journal article supplement (doi:10.1039/d1fo04432j), 2022-01-01
Supplement: d1fo04432j1.pdf [file d1fo04432j1.pdf]

## Supplementary data

Table 1: Primers sequences used in the current study

| Genes | Forward primers sequences (5'-3') | Reverse primers sequences (5'-3') | Genebank number             |
|-------|-----------------------------------|-----------------------------------|-----------------------------|
| GADPH | GGTGAAGGTCGGTGTGAACG              | CTCGCTCCTGGAAGATGGTG              | <a href="#">NM_008084.3</a> |
| iNOS  | CGGCAAACATGACTTCAGGC              | TCGATGCACAACCTGGGTGAA             | <a href="#">NM_010927.4</a> |
| COX-2 | ATGACTGCCCAACTCCCATG              | ACTGATGGGTGAAGTGCTGG              | <a href="#">NM_011198</a>   |
| IL-10 | GGTTGCCAAGCCTTATCGGA              | TCAGCTTCTCACCCAGGGAA              | <a href="#">NM_010548</a>   |

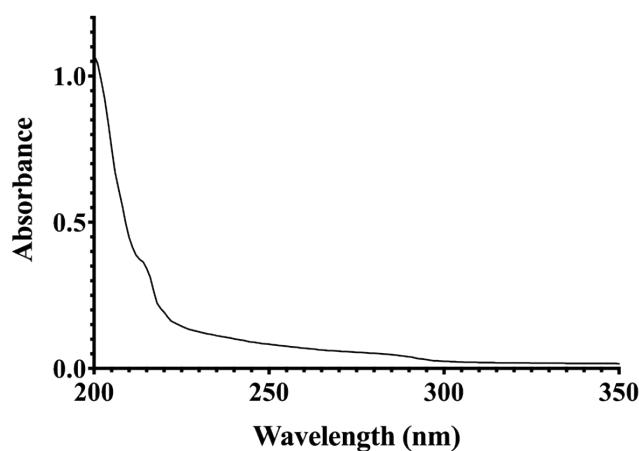

Figure S1. UV spectra of SMSP2 in the range of 200–350 nm

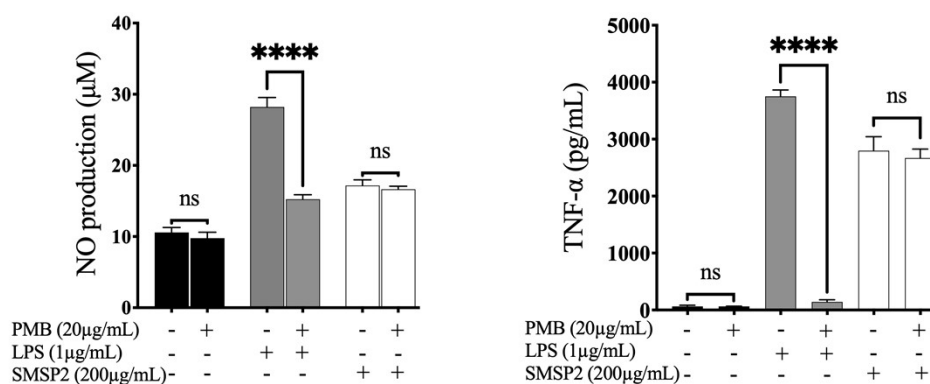

Figure S2. Endotoxin contamination test through PMB treatment on SMSP2 or LPS-induced NO and TNF- $\alpha$  production
